# Supplementary material
Source: PubMed Central journal article supplement (PMC9250890)
Supplement: mmc1.pdf [file mmc1.pdf]

**Supplemental information**

**Amelioration of SARS-CoV-2 infection by**

**ANO6 phospholipid scramblase inhibition**

**Ju-Ri Sim, Dong Hoon Shin, Pil-Gu Park, So-Hyeon Park, Joon-Yong Bae, Youngchae Lee, Dha-Yei Kang, Ye Jin Kim, Sowon Aum, Shin Hye Noh, Su Jin Hwang, Hye-Ran Cha, Cheong Bi Kim, Si Hwan Ko, Sunghoon Park, Dongkyu Jeon, Sungwoo Cho, Gee Eun Lee, Jeonghun Kim, Young-hye Moon, Jae-Ouk Kim, Jae-Sung Nam, Chang-Hoon Kim, Sungmin Moon, Youn Wook Chung, Man-Seong Park, Ji-Hwan Ryu, Wan Namkung, Jae Myun Lee, and Min Goo Lee**

## Supplemental Information for

### Amelioration of SARS-CoV-2 infection by ANO6 phospholipid scramblase inhibition

Ju-Ri Sim<sup>1,8</sup>, Dong Hoon Shin<sup>1,8</sup>, Pil-Gu Park<sup>2,8</sup>, So-Hyeon Park<sup>3,8</sup>, Joon-Yong Bae<sup>4,8</sup>,  
Youngchae Lee<sup>1</sup>, Dha-Yei Kang<sup>1</sup>, Ye Jin Kim<sup>1</sup>, Sowon Aum<sup>1</sup>, Shin Hye Noh<sup>1,7</sup>, Su Jin  
Hwang<sup>2</sup>, Hye-Ran Cha<sup>2</sup>, Cheong Bi Kim<sup>2</sup>, Si Hwan Ko<sup>2</sup>, Sunghoon Park<sup>2</sup>, Dongkyu  
Jeon<sup>3</sup>, Sungwoo Cho<sup>3</sup>, Gee Eun Lee<sup>4</sup>, Jeonghun Kim<sup>4</sup>, Young-hye Moon<sup>5</sup>, Jae-Ouk  
Kim<sup>5</sup>, Jae-Sung Nam<sup>6</sup>, Chang-Hoon Kim<sup>6</sup>, Sungmin Moon<sup>7</sup>, Youn Wook Chung<sup>7</sup>, Man-  
Seong Park<sup>4</sup>, Ji-Hwan Ryu<sup>7,\*</sup>, Wan Namkung<sup>3,\*</sup>, Jae Myun Lee<sup>2,\*</sup>, Min Goo Lee<sup>1,7,9,\*</sup>

#### **This PDF file includes:**

Figure S1 to S7

Table S1

Videos S1 to S8

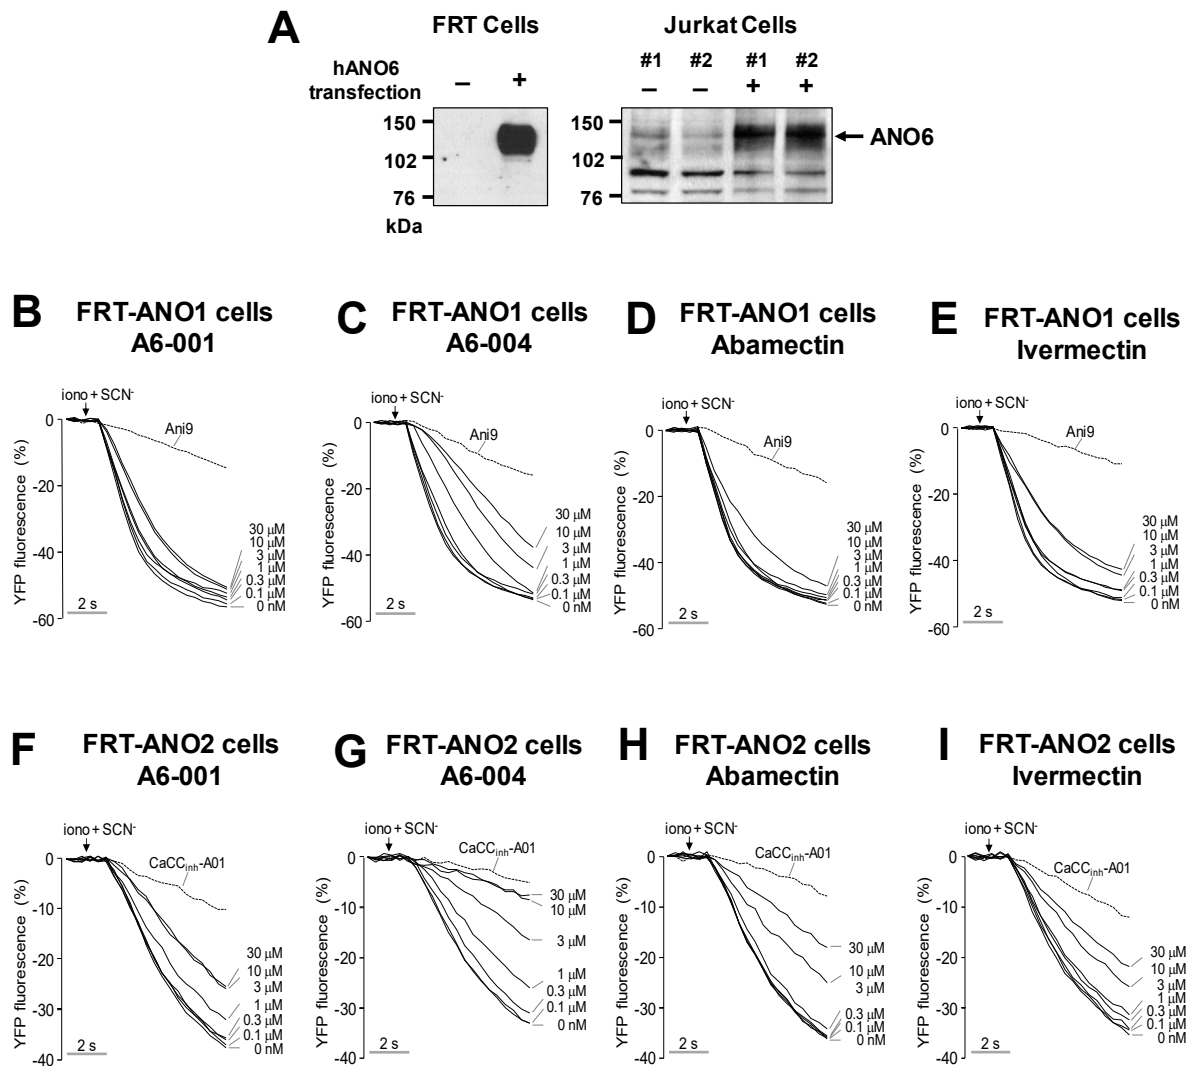

**Figure S1. Expression of ANO6 in FRT cells and effects of ANO6 inhibitors on ANO1 and ANO2, Related to Figure 1.**

(A) Immunoblotting of ANO6 in FRT and Jurkat cells with exogenous ANO6 expression. The FRT cells were stably transfected with pcDNA3.1-ANO6 (variant 5) and the Jurkat suspension cells were transiently transfected with the same plasmid using a NEPA21 Super Electroporator as described in Method Details. Jurkat cells also expressed a basal level of endogenous ANO6.

(B-E) ANO1 anion channel activity was measured in FRT cells expressing human ANO1 and the halide sensor YFP. Compounds were applied 10 min prior to ANO1 activation by 10  $\mu$ M ionomycin (iono). Permeation of  $\text{SCN}^-$  through ANO1 anion channels quenches the YFP fluorescence. ANO1 anion channels were fully inhibited by An9 (10  $\mu$ M). A summary of the dose response of ANO6 inhibitors on the ANO1 anion channel activity is shown in Figure 1G.

(F-I) ANO2 anion channel activities were measured in FRT cells expressing human ANO2 and the halide sensor YFP. ANO2 anion channels were fully inhibited by CaCCinh-A01 (30  $\mu$ M). A summary of the dose response of ANO6 inhibitors on the ANO2 anion channel activity is shown in Figure 1H.

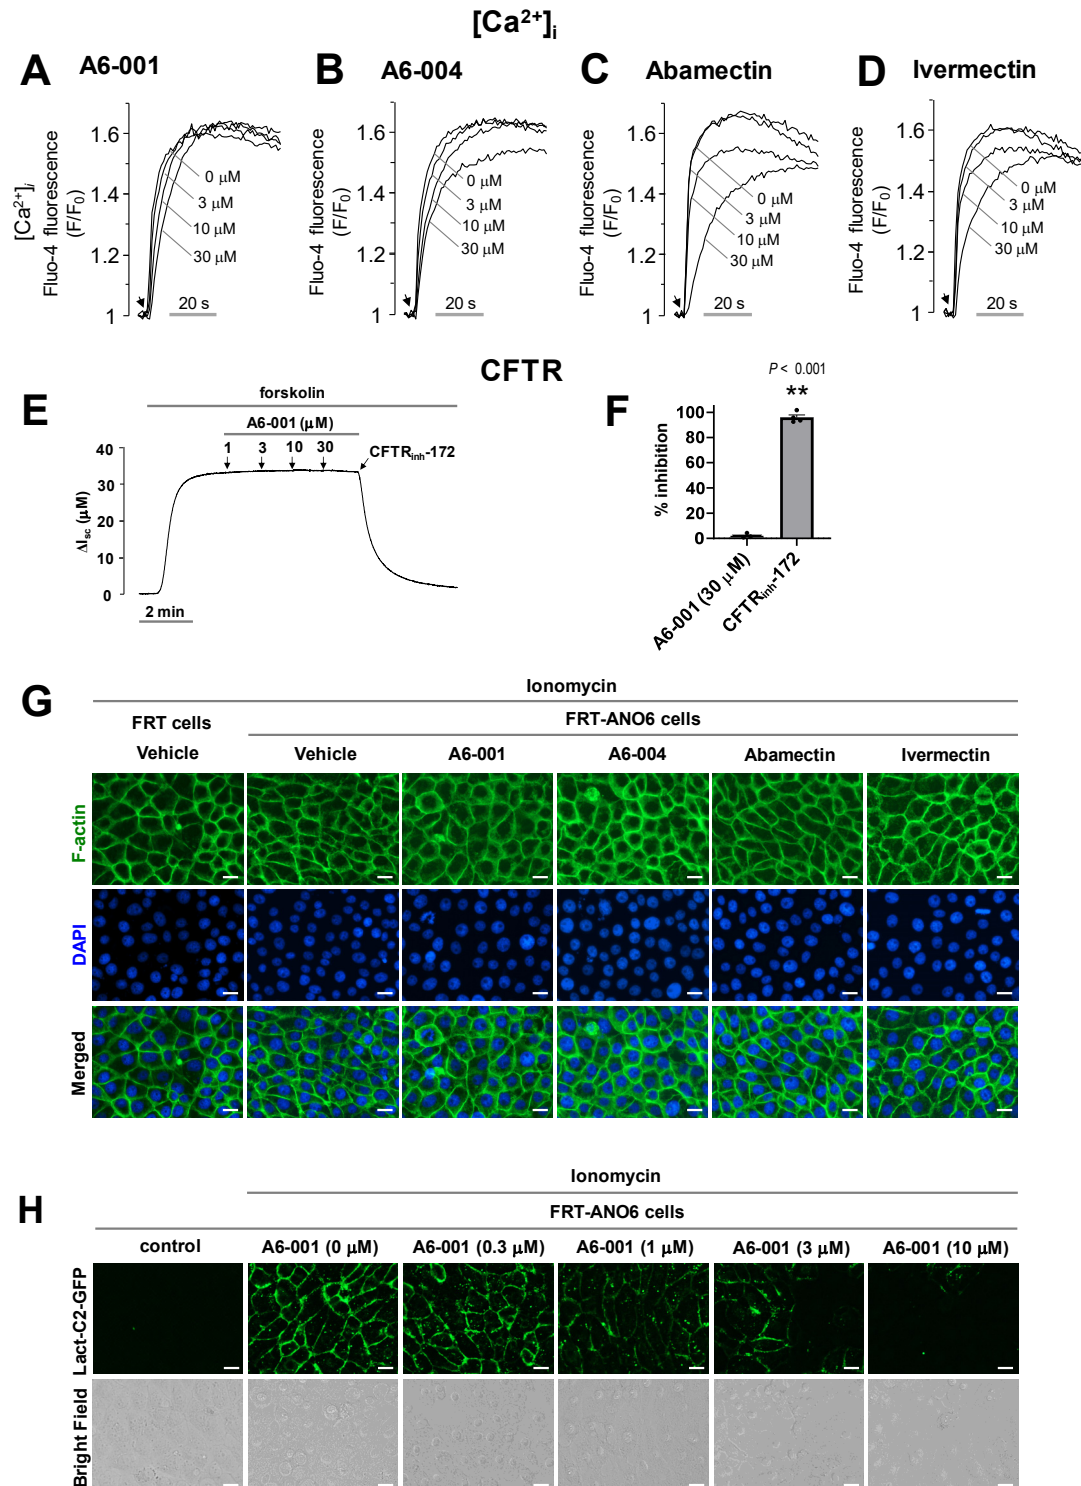

**Figure S2. Effects of ANO6 inhibitors on cytosolic  $Ca^{2+}$  levels, CFTR  $Cl^-$  currents, and cell morphology, Related to Figure 2.**

(A-D) Intracellular calcium ( $[Ca^{2+}]_i$ ) was monitored using the Fluo-4 NW calcium indicator. The FRT cells were treated with the indicated concentrations of compounds for 10 min and then ionomycin (10  $\mu$ M) was applied to evoke  $[Ca^{2+}]_i$  elevation. Representative traces of intracellular calcium responses pretreated with A6-001 (A), A6-004 (B), abamectin (C), and ivermectin (D) are shown. Three independent experiments yielded similar results.

(E and F) Effects of A6-001 on CFTR  $Cl^-$  channel activity. The apical membrane short-circuit currents ( $I_{sc}$ ) were measured in FRT-CFTR cells cultured on a permeable support. The basolateral membrane was permeabilized with amphotericin B (250  $\mu$ g/ml). CFTR was stimulated using forskolin (20  $\mu$ M) and blocked by CFTR<sub>inh</sub>-172 (20  $\mu$ M). Representative  $I_{sc}$  measurements are shown in (E) and a summary of the current inhibition rates by A6-001 (30  $\mu$ M) and CFTR<sub>inh</sub>-172 (20  $\mu$ M) is provided in (F, mean  $\pm$  SEM, n = 4,  $**P < 0.01$  using a two-tailed Student's *t*-test).

(G) Effects of ANO6 inhibitors on cytoskeletal structure and on the nuclei were analyzed using F-actin and DAPI staining. The newly identified ANO6 inhibitors do not noticeably affect the cell and nuclear morphologies. Three independent experiments showed similar results.

(H) The dose responses of A6-001 on ANO6 PS scramblase inhibition were analyzed. PS externalization was assessed via the fluorescence intensity of Lact-C2-GFP. A summary of the multiple experiments is shown in Figure 2F. Scale bar: 10  $\mu$ m.

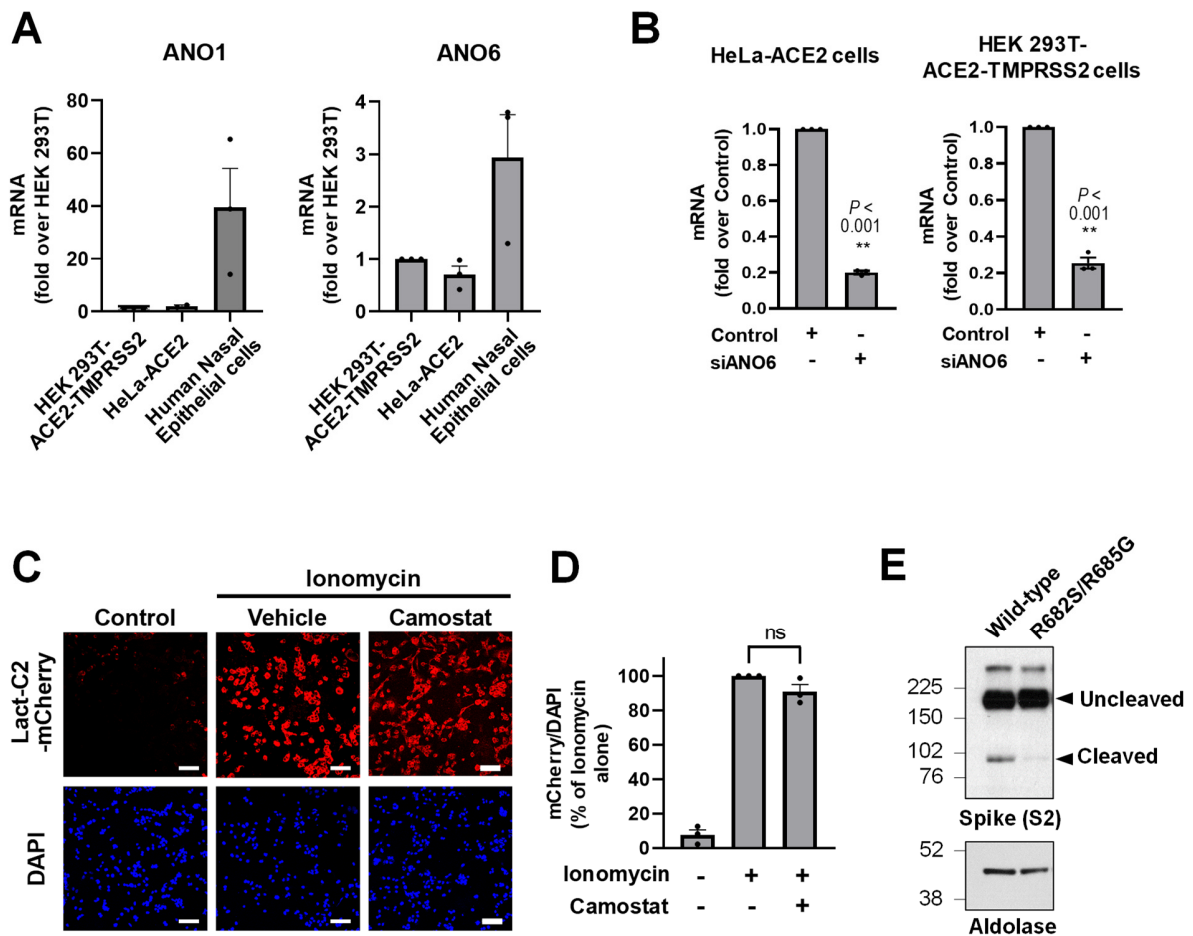

**Figure S3. Supporting results for Figures 3 and 4, Related to Figures 3 and 4.**

(A) mRNA quantification of ANO1/TMEM16A and ANO6/TMEM16F using qPCR. ANO1 is highly expressed in the primarily cultured human nasal epithelial (HNE) cells (left panel). The ANO6 expression levels in HEK-293T, HeLa, and HNE cells are shown in the right panel.

(B) The silencing of ANO6 mRNA via treatment with siRNAs against ANO6 was analyzed in HeLa-ACE2 cells and HEK 293T-ACE2-TMPRSS2 cells using qPCR. Cells were treated with scrambled or ANO6 siRNAs (100 nM in each case) for 24 h (n = 3).

(C and D) Effects of camostat on ionomycin (10  $\mu$ M, 10 min)-induced PS scrambling. The trypsin inhibitor camostat (100  $\mu$ M) was applied 1-h prior to ionomycin application. Representative images are shown in (C) and the summarized results of multiple experiments are depicted in (D, n = 3). Scale bar: 50  $\mu$ m.

(E) Immunoblot analysis of the SARS-CoV-2 Spike glycoprotein. The cell lysates of wild-type and R682S/R685G SARS2-PsV infected HEK 293T cells were blotted with primary antibodies against the S2 domain of Spike and aldolase A. The R682S/R685G mutant Spike proteins do not exhibit a protease cleaved form.

Bar graph data are shown as the mean  $\pm$  SEM. Data were analyzed using a two-tailed Student's *t*-test (B) or one-way analysis of variance followed by Tukey's multiple comparison test (D). \*\**P* < 0.01, ns: not significant.

### HEK 293T-ACE2-TMPRSS2 cells

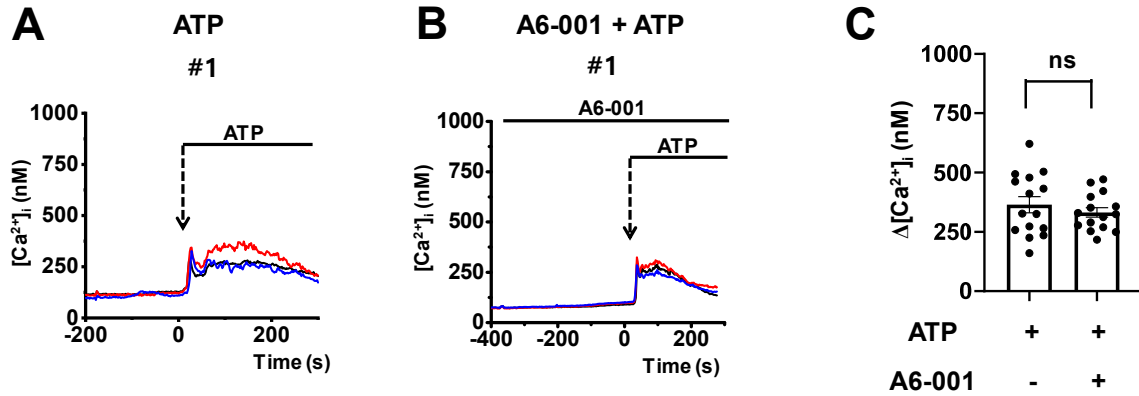

### Calu-3 cells

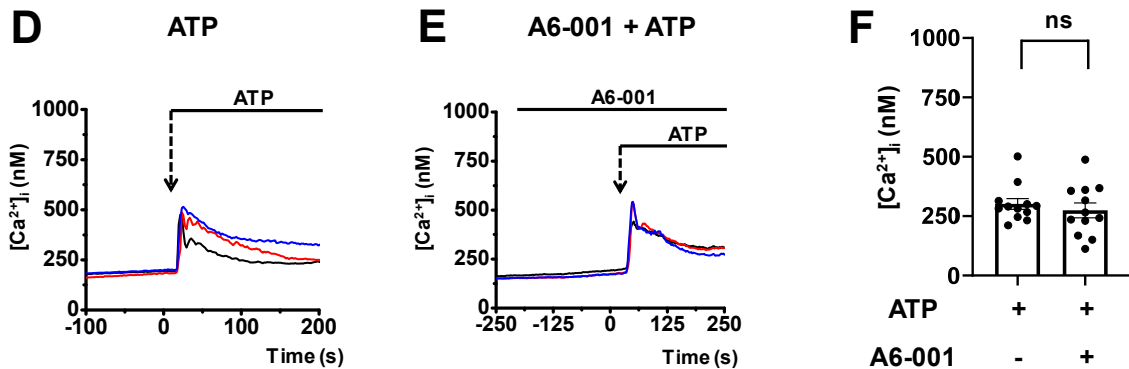

**Figure S4. A6-001 does not affect the ATP-induced  $\text{Ca}^{2+}$  response, Related to Figure 5.**

(A-C) Purinergic agonist (ATP, 100  $\mu\text{M}$ )-induced  $\text{Ca}^{2+}$  response in HEK 293T-ACE2-TMPRSS2 cells was monitored in the absence and presence of A6-001 (10  $\mu\text{M}$ ). Representative traces (two each) are shown in (A) and (B), respectively. A summary of  $\Delta[\text{Ca}^{2+}]_i$  increase is presented in (C,  $n = 15$ ).

(D-E) ATP-induced  $\text{Ca}^{2+}$  response (100  $\mu\text{M}$ ) in Calu-3 cells was monitored in the absence and presence of A6-001 (10  $\mu\text{M}$ ). Representative traces are shown in (D) and (E), respectively. A summary of  $\Delta[\text{Ca}^{2+}]_i$  increase is presented in (F,  $n = 12$ ).

Data were analyzed using a two-tailed Student's  $t$ -test. ns: not significant.

SARS-CoV-2 (0.01 MOI), 48 h, supernatant

Vero cells

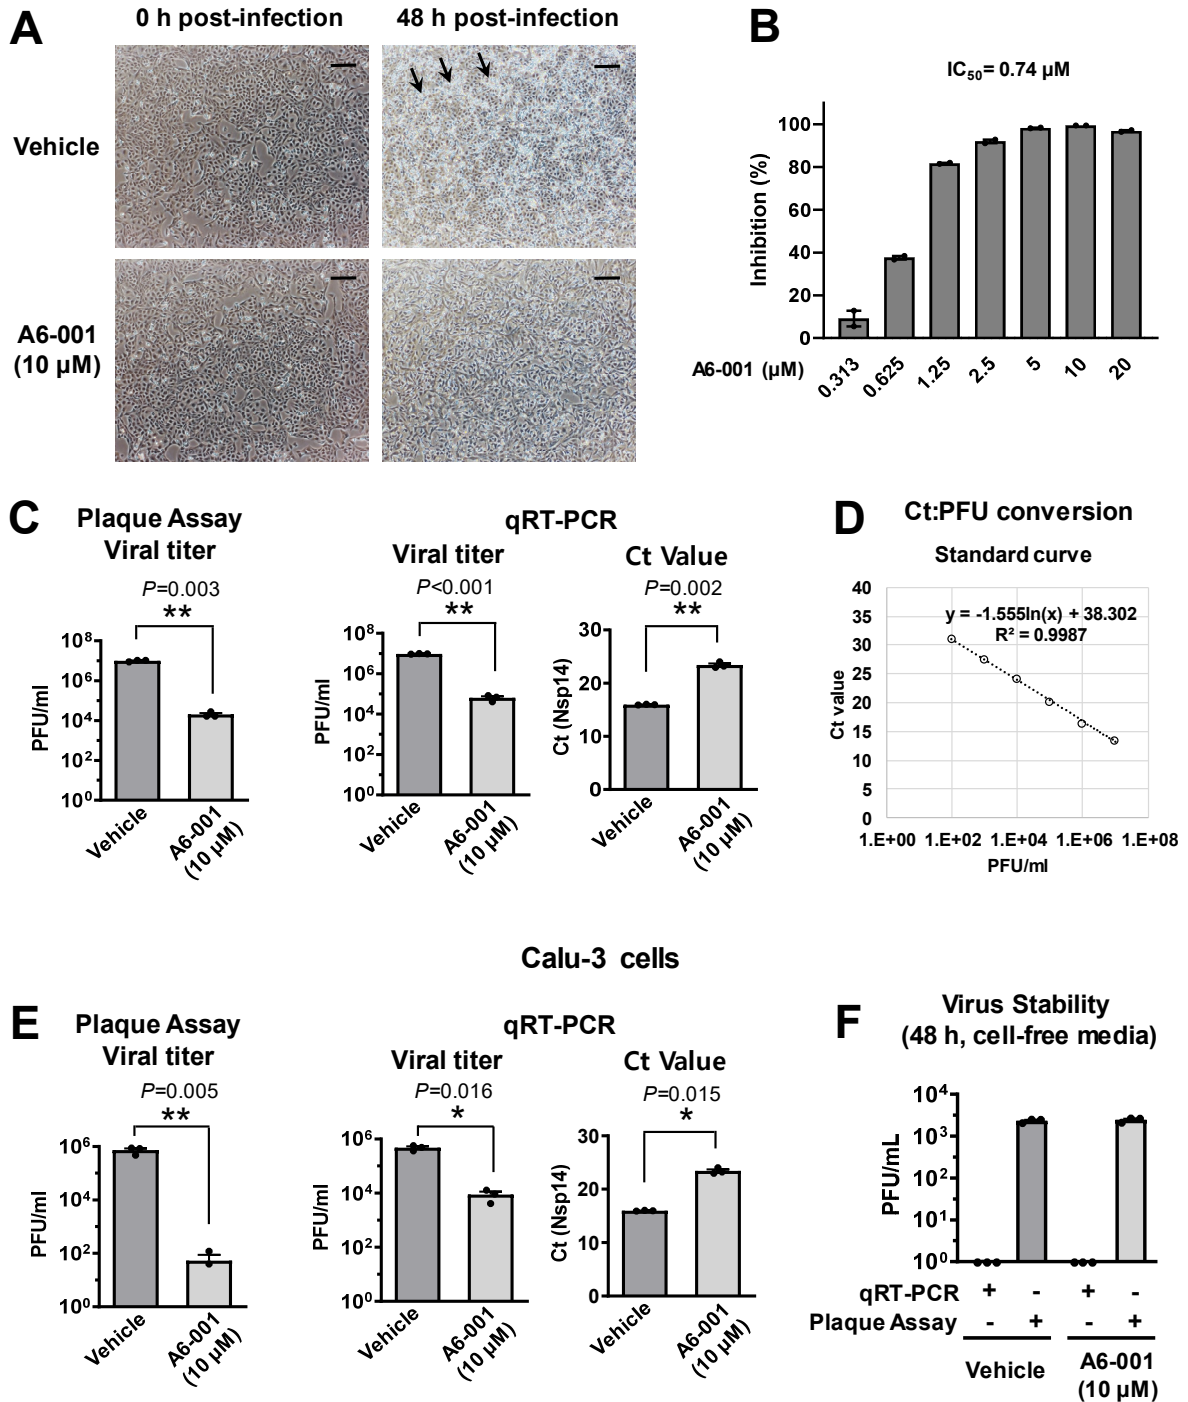

Figure S5. Effects of A6-001 on the viral replications of SARS-CoV-2 in Vero and Calu-3 cells, Related to Figure 7.



(A and B) Viral replication of SARS-CoV-2 in Vero cells with an infection dose of 0.01 MOI (ten times higher than that in Figure 7C-7E). In the light microscopic analysis, A6-001 reduced the virus-induced cytolysis (A, 48 h post-infection; arrows indicate cytolytic areas. Scale bar: 100  $\mu$ m). The  $IC_{50}$  value of A6-001 at 48 h post-infection is presented in (B, n = 2 at each concentration).

(C and D) The side-by side parallel data for RNA accumulations and output virus titers by plaque assay in Vero cells infected with SARS-CoV-2 (0.01 MOI). The plaque assay results indicate that A6-001 (10  $\mu$ M, 48 h) induced a 1/500 virus reduction ( $9.8 \times 10^6$  vs.  $2.0 \times 10^4$  PFU/ml, n = 3), while the qPCR results represent a 1/150 reduction ( $9.6 \times 10^6$  vs.  $6.4 \times 10^4$  PFU/ml, n = 3). The qPCR threshold cycle (Ct) values were converted into viral titer (PFU/ml). An example of standard curve for the conversion of Ct into viral titer is shown in (D).

(E and F) The side-by side parallel data for RNA accumulations and output virus titers by plaque assay in Calu-3 cells infected with SARS-CoV-2 (0.01 MOI). The plaque assay results indicate that A6-001 (10  $\mu$ M, 48 h) induced a 1/14,000 virus reduction ( $7.3 \times 10^5$  vs.  $5.3 \times 10^1$  PFU/ml, n = 3), while the qPCR results represent a 1/50 reduction ( $4.7 \times 10^5$  vs.  $8.8 \times 10^3$  PFU/ml, n = 3). Virus stability was analyzed after a 48-h incubation in cell-free media using the samples collected from culture supernatant at 0 h post-infection (F, n = 3). The SARS-CoV-2 loses viability after a 48-h incubation in cell-free media. Note that qPCR detects non-viable viruses.

Bar graph data are shown as the mean  $\pm$  SEM. \* $P < 0.05$ , \*\* $P < 0.01$ : Data were analyzed using a two-tailed Student's *t*-test.

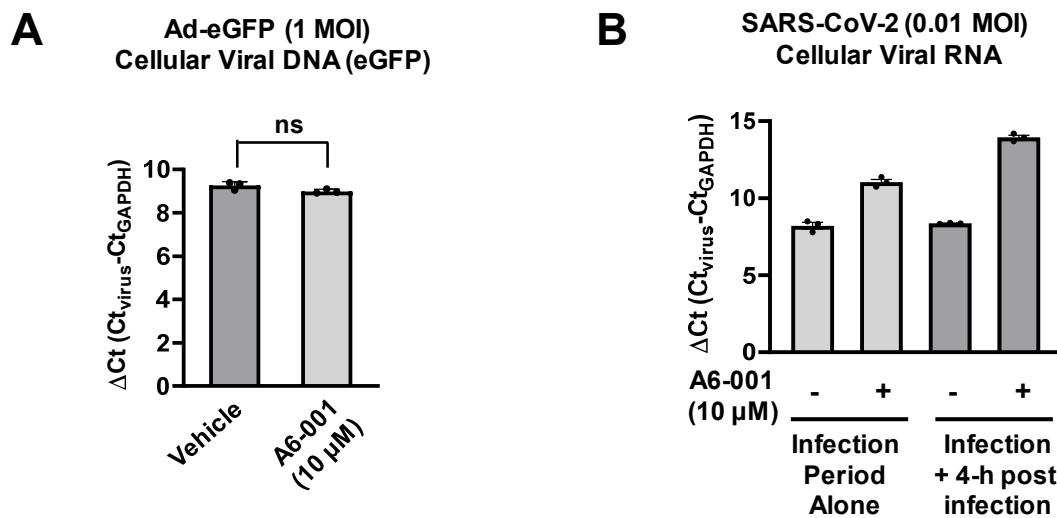

**Figure S6. Effects of A6-001 on the viral replications of SARS-CoV-2 and adenoviruses, Related to Figure 7.**

(A) Effects of A6-001 on the viral replications of non-enveloped adenoviruses were analyzed. HEK 293T cells were infected with the recombinant eGFP adenovirus (Ad-eGFP, 1 MOI) and incubated for 48 h. The quantity of viral transgene was quantified using qPCR assays with cellular DNA samples. A6-001 (10  $\mu M$ ) did not affect replications of the recombinant adenovirus ( $n = 3$ ).

(B) Vero cells were infected with SARS-CoV-2 (0.01 MOI) and cellular viral RNAs were quantified using qPCR at 4 h post-infection. A6-001 (10  $\mu M$ ) was treated during the infection period alone (for 2-h pretreatment and 1-h post-infection,  $\Delta\Delta C_t = 2.84 \pm 0.16$ ,  $n = 3$ ) or during both the infection and the 4 h post-infection periods ( $\Delta\Delta C_t = 5.58 \pm 0.15$ ,  $n = 3$ ).

Bar graph data are shown as the mean  $\pm$  SEM. Data were analyzed using a two-tailed Student's *t*-test. ns: not significant.  $C_t$ : threshold cycle, GAPDH: glyceraldehyde 3-phosphate dehydrogenase.

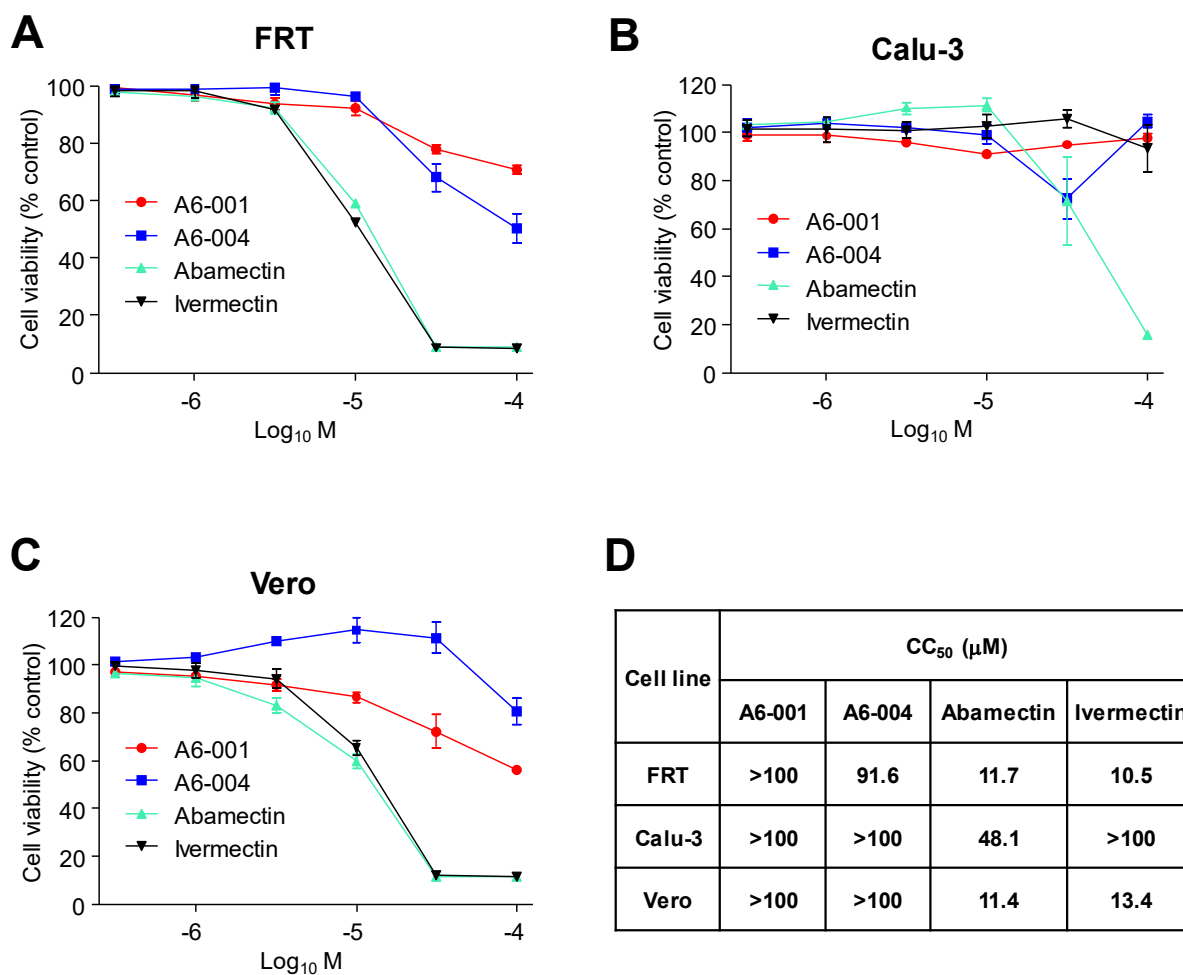

**Figure S7. Cell viability analysis of ANO6 inhibitors, Related to Figure 7.**

(A-C) FRT (A), Calu-3 (B), and Vero cells (C) were treated with the indicated concentrations of A6-001, A6-004, abamectin, and ivermectin for 48 h. Cisplatin (50 μM) was used as a positive control. Cell viability was determined using the MTS assay (mean ± SEM, n = 6).

(D) The CC<sub>50</sub> (the half-maximal cytotoxic concentration) values are summarized.

**Table S1.** IC<sub>50</sub> of ANO6 inhibitors on ANO1, ANO2, and ANO6 anion channels, Related to Figure 1.

|             | <b>A6-001</b>      | <b>A6-004</b>     | <b>abamectin</b>   | <b>ivermectin</b> |
|-------------|--------------------|-------------------|--------------------|-------------------|
| <b>ANO1</b> | 41.9 ± 4.8 (460.4) | 5.24 ± 0.5 (3.2)  | 58.1 ± 5.9 (232.4) | 29.1 ± 2.7 (29.4) |
| <b>ANO2</b> | 8.20 ± 0.91 (90.1) | 0.99 ± 0.10 (0.6) | 9.05 ± 0.59 (36.2) | 16.9 ± 2.2 (17.1) |
| <b>ANO6</b> | 0.091 ± 0.011      | 1.64 ± 0.20       | 0.25 ± 0.06        | 0.99 ± 0.36       |

The IC<sub>50</sub> values are presented in μM. The numbers in parenthesis represent ANO6 selectivity against each ANO paralog.

## Supplemental Videos

**Video S1.** Time-lapse imaging of HEK 293T-ACE2-TMPRSS2 (Red)/CHO-Control (Green) co-cultures, Related to Figures 4G and 4H

**Video S2.** Time-lapse imaging of HEK 293T-ACE2-TMPRSS2 (Red)/CHO-Spike (Green) co-cultures, Related to Figures 4G and 4H

**Video S3.** Time-lapse imaging of HEK 293T-ACE2-TMPRSS2 (Red)/CHO-Spike (Green) co-cultures, A6-001 (10  $\mu$ M) treated, Related to Figures 4G and 4H

**Video S4.**  $[Ca^{2+}]_i$  measurement in HEK 293T-ACE2-TMPRSS2 cells: mock vehicle, Related to Figures 5A and 5B

**Video S5.**  $[Ca^{2+}]_i$  measurement in HEK 293T-ACE2-TMPRSS2 cells: SARS2-PsV alone, Related to Figures 5C and 5D

**Video S6.**  $[Ca^{2+}]_i$  measurement in HEK 293T-ACE2-TMPRSS2 cells: BAPTA pretreatment (BAPTA-AM, 3  $\mu$ M, 20 min) plus SARS2-PsV, Related to Figures 5E and 5F

**Video S7.**  $[Ca^{2+}]_i$  measurement in HEK 293T-ACE2-TMPRSS2 cells: camostat pretreatment (10  $\mu$ M) plus SARS2-PsV, Related to Figures 5G and 5H

**Video S8.**  $[Ca^{2+}]_i$  measurement in HEK 293T-ACE2-TMPRSS2 cells: A6-001 pretreatment (10  $\mu$ M) plus SARS2-PsV, Related to Figures 5I and 5J
